# Supplementary material for: Small Diameter Cell-Free Tissue-Engineered Vascular Grafts: Biomaterials and Manufacture Techniques to Reach Suitable Mechanical Properties
Source: MDPI journal article supplement (doi:10.3390/polym14173440), 2022-08-23
Supplement: s1 [file s1]

# Small diameter cell-free Tissue Engineered Vascular Grafts: Biomaterials and manufacture techniques to reach suitable mechanical properties.

María A. Rodríguez-Soto <sup>1</sup>, Camilo Andrés Polanía <sup>2,4</sup>, Andrés M. Aragón-Rivera <sup>1</sup>, Daniel Buitrago <sup>1</sup>, María Ayala <sup>1</sup>, Alejandro Velandia-Sánchez <sup>2,4</sup>, Gabriela Peralta <sup>1</sup>, Juan C. Cruz <sup>1</sup>, Carolina Muñoz Camargo <sup>1</sup>, Juan Guillermo Barrera-Carvajal <sup>2</sup>, Jaime Camacho-Mackenzie <sup>2</sup>, Juan Carlos Briceño <sup>1,3</sup> \*

## Supplementary methodology

Figure S1. PRISMA algorithm for pre-clinical trials.

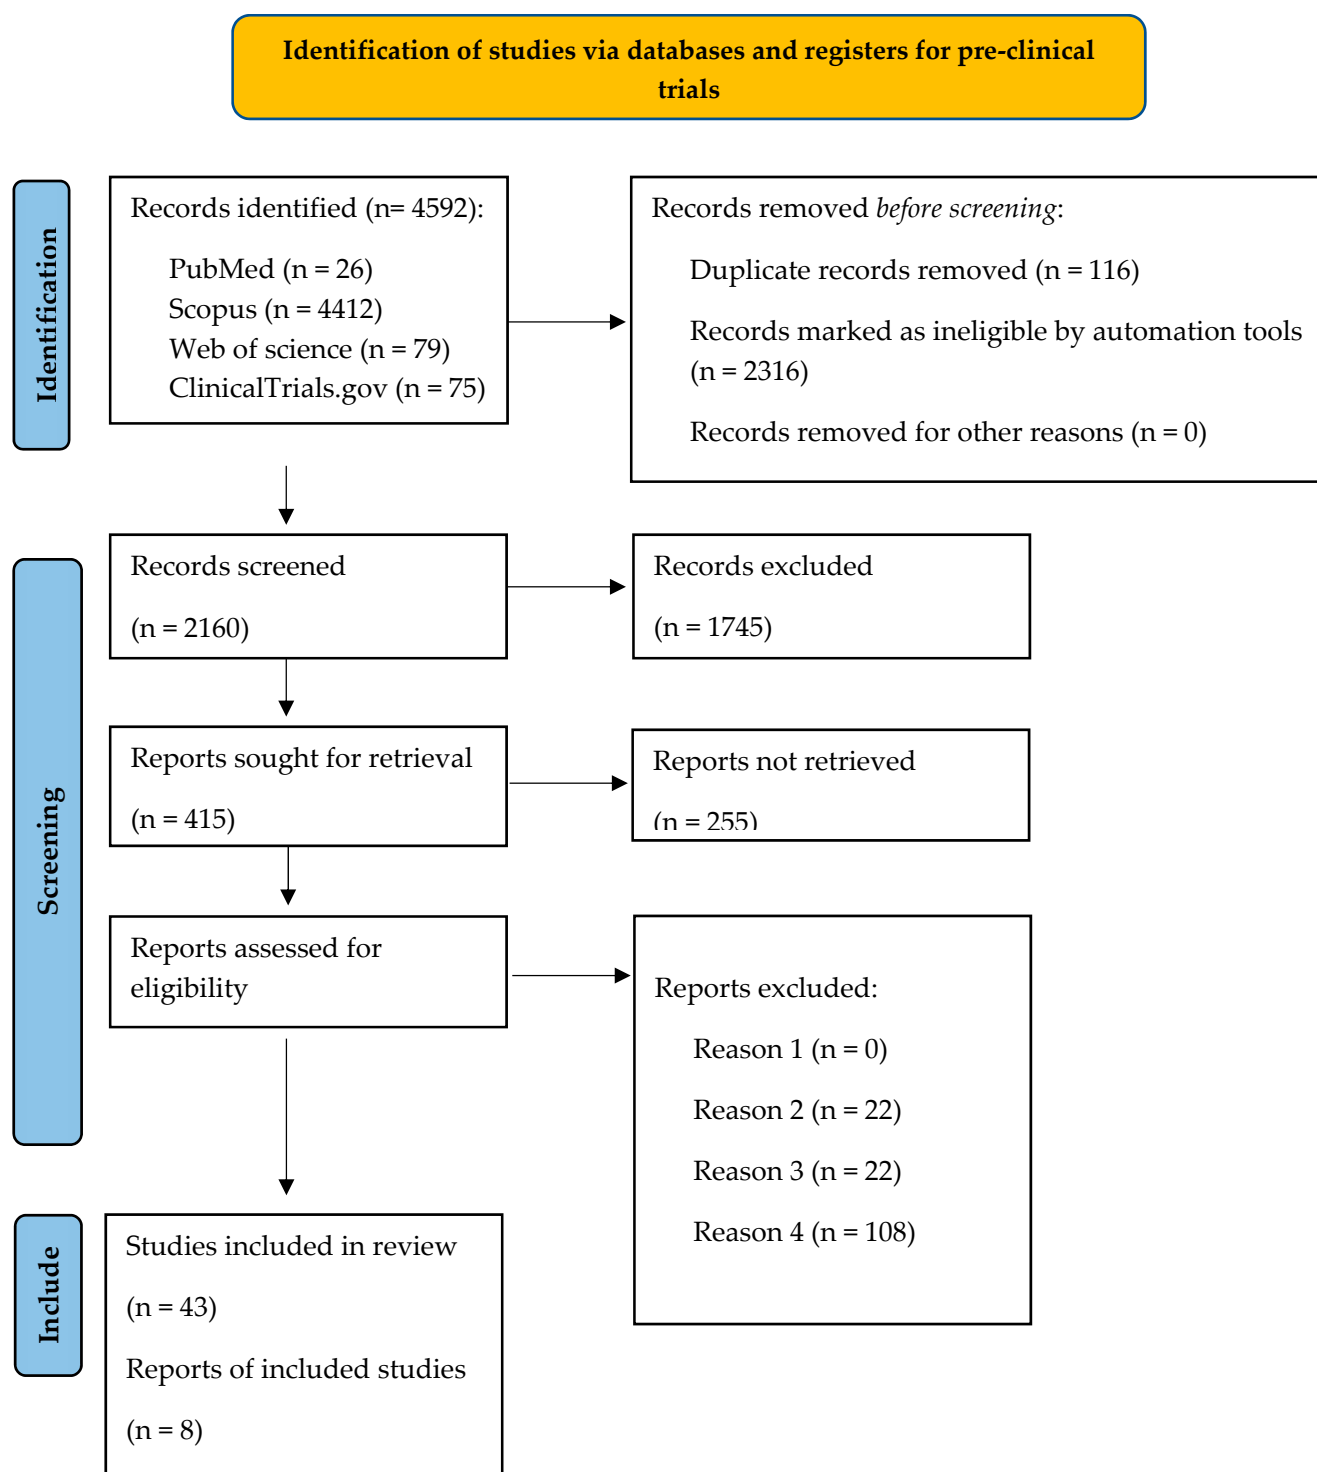

Figure S2. PRISMA algorithm for in vitro trials.

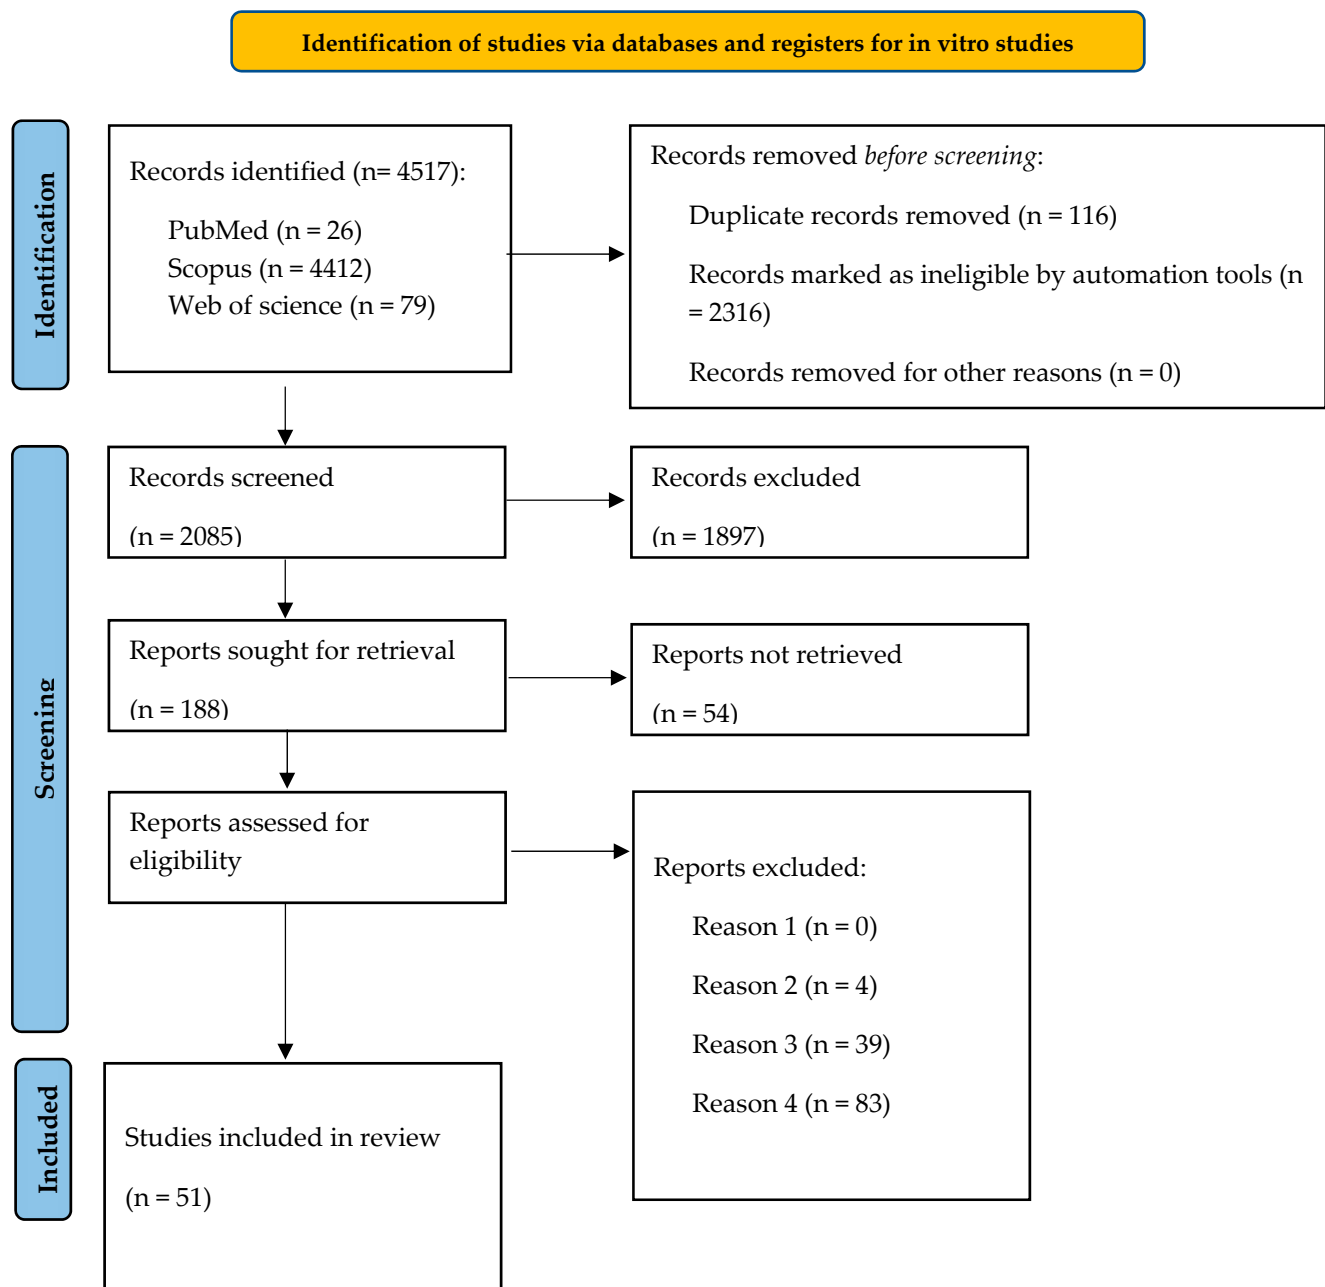

#### Exclusion criteria

- Reason 1: Studies and/or records published in a language different than English or Spanish
- Reason 2: Studies with pre-seeded cells
- Reason 3: Studies with insufficient data for retrieval
- Reason 4: Studies not relevant for the review

## Supplementary data

### Summary tables of descriptive analysis

Table S1. Summary of mechanical properties of TEGVs found in Clinicaltrials.gov

|                                                            | POSS-<br>PCU          | Humacy<br>te | Artegraft             | BioIntegral<br>Surgical No-<br>React ® | TRUE                  | Saphe<br>nous<br>vein | IMA  |
|------------------------------------------------------------|-----------------------|--------------|-----------------------|----------------------------------------|-----------------------|-----------------------|------|
| <b>Circumferen<br/>tial tensile<br/>strength<br/>(Kpa)</b> | No<br>informati<br>on | 1400         | 1800                  | 2500                                   | 3800                  | 9760                  | 4100 |
| <b>Longitudina<br/>l tensile<br/>strength<br/>(Kpa)</b>    | 3210                  | 1200         | 2500                  | 10000                                  | No<br>informati<br>on | 2405                  | 4300 |
| <b>Suture<br/>resistance<br/>strength<br/>(Kpa)</b>        | 4460                  | 2600         | No<br>informati<br>on | No information                         | 1950                  | 3200                  | 1350 |
| <b>Dynamic<br/>compliance<br/>(%/100<br/>mmHg)</b>         | 1.59                  | 1.5          | 1.5                   | No information                         | No<br>informati<br>on | 4.4                   | 5.22 |

Table S2. Summary of mechanical properties of TEGVs in pre-clinical trials in animal models compared to saphenous vein grafts and internal mammary artery properties.

|                                                        | PCL based<br>TEVGs<br>(n=26) | Decellul<br>arized<br>TEVGs<br>(n=4) | PLCL<br>based<br>TEVGs<br>(n=5) | PU based TEVGs<br>(n=6) | Saphe<br>nous<br>s vein | IMA  |
|--------------------------------------------------------|------------------------------|--------------------------------------|---------------------------------|-------------------------|-------------------------|------|
| <b>Circumferenti<br/>al tensile<br/>strength (Kpa)</b> | 2106 ±<br>1412               | 4350 ±<br>210                        | 4233 ± 680                      | No data due to<br>n=0   | 9760                    | 4100 |
| n of data<br>analysed                                  | 10                           | 2                                    | 3                               | 0                       | -                       | -    |
| <b>Longitudinal<br/>tensile<br/>strength (Kpa)</b>     | 3616 ±<br>1329               | 4600 ±<br>4942                       | 9525 ±<br>6453                  | 4212 ± 1789             | 2405                    | 4300 |
| n of data<br>analysed                                  | 11                           | 3                                    | 4                               | 6                       | -                       | -    |
| <b>Suture<br/>resistance<br/>strength (Kpa)</b>        | 1210 ± 920                   | 6700 ±<br>7490                       | 2600                            | 2620 ± 1950             | 3200                    | 1350 |

|                                        |             |                    |   |             |     |      |
|----------------------------------------|-------------|--------------------|---|-------------|-----|------|
| n of data analysed                     | 7           | 2                  | 1 | 3           | -   | -    |
| <b>Dynamic compliance (%/100 mmHg)</b> | 2.62 ± 1.95 | No data due to n=0 | 8 | 2.62 ± 1.95 | 4.4 | 5.22 |
| n of data analysed                     | 5           | 0                  | 1 | 2           | -   | -    |

Table S3. Summary of mechanical properties of TEGVs in in vitro studies compared to saphenous vein grafts and internal mammary artery properties.

|                                               | PCL based<br>TEVGs (n=21) | TPU based<br>TEVGs (n=5) | PLGA based<br>TEVGs (n=4) | Saphenous vein | IMA  |
|-----------------------------------------------|---------------------------|--------------------------|---------------------------|----------------|------|
| <b>Circumferential tensile strength (Kpa)</b> | 3594 ± 2486               | 2570                     | 8350                      | 9760           | 4100 |
| n of data analysed                            | 5                         | 1                        | 1                         | -              | -    |
| <b>Longitudinal tensile strength (Kpa)</b>    | 4107 ± 2376               | 15750 ± 4546             | 5008 ± 3468               | 2405           | 4300 |
| n of data analysed                            | 13                        | 5                        | 4                         | -              | -    |
| <b>Suture resistance strength (Kpa)</b>       | 4520 ± 4130               | 7860 ± 1600              | 1950 ± 1670               | 3200           | 1350 |
| n of data analysed                            | 3                         | 2                        | 2                         | -              | -    |
| <b>Dynamic compliance (%/100 mmHg)</b>        | 5.42 ± 2.65               | No data due to n=0       | 3.41                      | 4.4            | 5.22 |
| n of data analysed                            | 2                         | 0                        | 1                         | -              | -    |

Tables from descriptive analysis of pre-clinical trials

Table S4. Primary materials used in the manufacture of TEGVs that have been tested on pre-clinical animal models.

| Primary materials used | Frequency | % |
|------------------------|-----------|---|
|------------------------|-----------|---|

|                       |    |       |
|-----------------------|----|-------|
| PCL                   | 26 | 46.43 |
| SF                    | 1  | 1.79  |
| PHBV                  | 2  | 3.57  |
| PLCL                  | 5  | 8.93  |
| PGS                   | 3  | 5.36  |
| Decellularized Artery | 4  | 7.14  |
| ECM                   | 1  | 1.79  |
| PGA                   | 1  | 1.79  |
| PLLA                  | 1  | 1.79  |
| Chitosan              | 1  | 1.79  |
| PU                    | 6  | 10.71 |
| CA                    | 1  | 1.79  |
| TEC                   | 1  | 1.79  |
| TPU                   | 1  | 1.79  |
| PLA                   | 1  | 1.79  |
| PLGA                  | 1  | 1.79  |
| Total                 | 56 | 100   |

Table S5. Secondary materials used in the manufacture of TEVGs that have been tested on pre-clinical animal models.

| Secondary materials used | Frequency | %     |
|--------------------------|-----------|-------|
| Chitosan                 | 1         | 9.09  |
| SF                       | 1         | 9.09  |
| Collagen I               | 3         | 27.27 |
| Gelatin                  | 2         | 18.18 |
| PDO (Polydioxanone)      | 1         | 9.09  |
| Biotin                   | 1         | 9.09  |
| PEGDA                    | 1         | 9.09  |
| Fibrin                   | 1         | 9.09  |
| Total                    | 11        | 100   |

Table S6. Types of functionalization used in the manufacture of TEVGs that have been tested on pre-clinical animal models.

| Functionalization | Frequency | %     |
|-------------------|-----------|-------|
| Anticoagulant     | 10        | 38.46 |
| Other peptides    | 3         | 11.54 |
| Antibodies        | 1         | 3.85  |

|                      |       |         |
|----------------------|-------|---------|
| Growing factors      | 4     | 15.38   |
| Collagen             | 2     | 7.69    |
| Antihyperlapsedia    | 1     | 3.85    |
| MMPs inhibitors      | 1     | 3.85    |
| Antioxidant          | 1     | 3.85    |
| Iloprost             | 1     | 3.85    |
| CCL-2                | 1     | 3.85    |
| Nitric Oxide release | 1     | 3.85    |
| Total                | 26    | 100     |
| 25 studies out       |       |         |
| No functionalization | of 43 | 53.4884 |

Table S7. Subgroup analysis of functionalization based on growing factors used in the manufacture of TEVGs that have been tested on pre-clinical animal models.

| Growing factors used for functionalization | Frequency | %   |
|--------------------------------------------|-----------|-----|
| VEGF                                       | 4         | 40  |
| PDGR                                       | 1         | 10  |
| bFGF                                       | 2         | 20  |
| SDF 1a                                     | 3         | 30  |
| Total                                      | 10        | 100 |

Table S8. Number of layers of TEVGs that have been tested on pre-clinical animal models.

| Vascular graft morphology | Frequency | %     |
|---------------------------|-----------|-------|
| Monolayer                 | 23        | 53.49 |
| Bilayer                   | 14        | 32.56 |
| Tri-layer                 | 3         | 6.98  |
| No information retrieved  | 3         | 6.98  |
| Total                     | 43        | 100   |

Table S9. Integration technique for the development of TEVGs that have been tested on pre-clinical animal models.

| Integration made by      | Frequency | %     |
|--------------------------|-----------|-------|
| Blend                    | 26        | 60.47 |
| Coexists                 | 4         | 9.3   |
| No information retrieved | 13        | 30.23 |
| Total                    | 43        | 100   |

Table S10. Primary manufacturing technique of TEVGs that have been tested on pre-clinical animal models.

| Initial manufacturing technique                 | Frequency   | %     |
|-------------------------------------------------|-------------|-------|
| Electrospinning                                 | 25          | 58.14 |
| Freeze drying                                   | 3           | 6.98  |
| Emulsion electrospinning                        | 2           | 4.65  |
| Pericardium decellularization                   | 1           | 2.33  |
| Spiral Shell implanted on dog                   | 1           | 2.33  |
| Felt                                            | 1           | 2.33  |
| Wet Spinning                                    | 2           | 4.65  |
| Phase Separation                                | 1           | 2.33  |
| 3D printing                                     | 2           | 4.65  |
| Aorta decellularization                         | 3           | 6.98  |
| Bio-tubing                                      | 1           | 2.33  |
| Core coating                                    | 1           | 2.33  |
| Total                                           | 43          | 100   |
| Grafts requiring double manufacturing technique | 8 out of 43 | 18.6  |
| Monolayer                                       | 4           | 50    |
| Bilayer                                         | 2           | 25    |
| Tri-layer                                       | 2           | 25    |
| Total                                           | 8           | 100   |

Table S11. Secondary manufacturing technique of TEVGs that have been tested on pre-clinical animal models.

| Secondary manufacturing technique | Frequency    | %    |
|-----------------------------------|--------------|------|
| Electrospinning                   | 3            | 37.5 |
| Freeze thawing                    | 1            | 12.5 |
| Electrospinning yarn              | 2            | 25   |
| Layer by layer assembly           | 1            | 12.5 |
| Magnetic Field                    | 1            | 12.5 |
| Total                             | 8            | 100  |
| Not requiring second technique    | 35 out of 43 | 81.4 |

Table S12. Fiber diameter of TEVGs that have been tested on pre-clinical animal models.

| Fiber diameter um (n= 31) | Values     |
|---------------------------|------------|
| Mean                      | 2.4        |
| Median                    | 1          |
| SD                        | 2.45       |
| 95% CI                    | -0.05 4.85 |

|                          |                 |       |
|--------------------------|-----------------|-------|
| Min - Max                | 0.18            | 8     |
| No information retrieved | 12 out of<br>43 | 27.91 |

Table S13. Internal diameter of TEVGs that have been tested on pre-clinical animal models.

| Internal diameter mm (n= 42) | Values         |      |
|------------------------------|----------------|------|
| Mean                         | 2.36           |      |
| Median                       | 2              |      |
| SD                           | 1.48           |      |
| 95% CI                       | 0.89           | 3.84 |
| Min - Max                    | 0.6            | 6    |
| No information retrieved     | 1 out of<br>43 | 2.33 |

Table S14. Wall thickness of TEVGs that have been tested on pre-clinical animal models.

| Wall thickness mm (n= 41) | Values         |      |
|---------------------------|----------------|------|
| Mean                      | 0.49           |      |
| Median                    | 0.5            |      |
| SD                        | 0.34           |      |
| 95% CI                    | 0.15           | 0.83 |
| Min - Max                 | 0.11           | 2    |
| No information retrieved  | 2 out of<br>43 | 4.65 |

Table S15. Animal models used in TEVGs that have been tested on pre-clinical animal models.

| Animal | Frequency | %     |
|--------|-----------|-------|
| Rat    | 28        | 65.12 |
| Rabbit | 3         | 6.98  |
| Goat   | 1         | 2.33  |
| Mice   | 2         | 4.65  |



|       |    |       |
|-------|----|-------|
| Sheep | 6  | 13.95 |
| Pig   | 1  | 2.33  |
| Dog   | 2  | 4.65  |
| Total | 43 | 100   |

Table S16. Vascular segments used for experimentation of TEVGs that have been tested on pre-clinical animal models.

| <b>Vascular segment</b> | <b>Frequency</b> | <b>%</b> |
|-------------------------|------------------|----------|
| Aorta                   | 24               | 55.81    |
| Carotid                 | 13               | 30.23    |
| Subcutaneous            | 4                | 9.3      |
| Femoral                 | 1                | 2.33     |
| Arterial                | 1                | 2.33     |
| Total                   | 43               | 100      |

Table S17. Patency rates in months of TEVGs that have been tested on pre-clinical animal models.

| <b>Patency months (n= 42)</b> | <b>Values</b> |      |
|-------------------------------|---------------|------|
| Mean                          | 4.31          |      |
| Median                        | 3             |      |
| SD                            | 4.54          |      |
| 95% CI                        | -0.23         | 8.85 |
| Min - Max                     | 0.1           | 18   |
| No information retrieved      | 1 out of 43   | 2.33 |

Table S18. Presence of endothelization in TEVGs that have been tested on pre-clinical animal models.

| <b>Endothelization</b>   | <b>Frequency</b> | <b>%</b> |
|--------------------------|------------------|----------|
| Yes                      | 31               | 72.09    |
| No                       | 12               | 27.91    |
| Total                    | 43               | 100      |
| No information retrieved | 1 out of 43      | 2.33     |

Table S19. Cell infiltration rates of TEVGs that have been tested on pre-clinical animal models.

| <b>Cell Infiltration % (n= 31)</b> | <b>Values</b> |        |
|------------------------------------|---------------|--------|
| Mean                               | 66.13%        |        |
| Median                             | 70.00%        |        |
| SD                                 | 16.42%        |        |
| 95% CI                             | 49.71%        | 82.55% |

|                          |                 |        |
|--------------------------|-----------------|--------|
| Min - Max                | 30.00%          | 90.00% |
| No information retrieved | 12 out of<br>43 | 27.91  |

Table S20. Porosity reported of TEVGs that have been tested on pre-clinical animal models.

| Porosity % (n= 15)       | Values          |        |
|--------------------------|-----------------|--------|
| Mean                     | 78.36%          |        |
| Median                   | 78.50%          |        |
| SD                       | 11.64%          |        |
| 95% CI                   | 66.72%          | 89.99% |
| Min - Max                | 50.00%          | 91.60% |
| No information retrieved | 28 out of<br>43 | 65.12  |

Table S21. Circumferential tensile strength of TEVGs that have been tested on pre-clinical animal models.

| Circumferential tensile strength MPa (n= 17) | Values          |       |
|----------------------------------------------|-----------------|-------|
| Mean                                         | 5.26            |       |
| Median                                       | 2.9             |       |
| SD                                           | 8.81            |       |
| 95% CI                                       | -3.55           | 14.07 |
| Min - Max                                    | 0.03            | 35    |
| No information retrieved                     | 26 out of<br>43 | 60.47 |

Table S22. Longitudinal tensile strength of TEVGs that have been tested on pre-clinical animal models.

| Longitudinal tensile strength MPa (n= 31) | Values |       |
|-------------------------------------------|--------|-------|
| Mean                                      | 7.63   |       |
| Median                                    | 4.74   |       |
| SD                                        | 7.62   |       |
| 95% CI                                    | 0.01   | 15.24 |

|                          |                 |       |
|--------------------------|-----------------|-------|
| Min - Max                | 0.3             | 35    |
| No information retrieved | 12 out of<br>43 | 27.91 |

Table S23. Burst strength of TEVGs that have been tested on pre-clinical animal models.

| <b>Burst Strength mmHg (n= 24)</b> | <b>Values</b>   |         |
|------------------------------------|-----------------|---------|
| Mean                               | 1975.88         |         |
| Median                             | 1600            |         |
| SD                                 | 1709.84         |         |
| 95% CI                             | 266.04          | 3685.71 |
| Min - Max                          | 356.9           | 8690    |
| No information retrieved           | 21 out of<br>43 | 48.84   |

Table S24. Suture retention strength of TEVGs that have been tested on pre-clinical animal models.

| <b>Suture retention strength N (n= 16)</b> | <b>Values</b>   |       |
|--------------------------------------------|-----------------|-------|
| Mean                                       | 2.23            |       |
| Median                                     | 1.38            |       |
| SD                                         | 2.85            |       |
| 95% CI                                     | -0.63           | 5.08  |
| Min - Max                                  | 0.17            | 12    |
| No information retrieved                   | 27 out of<br>43 | 62.79 |

Table S25. Kink diameter of TEVGs that have been tested on pre-clinical animal models.

| <b>Kink diameter mm (n= 3)</b> | <b>Values</b>   |       |
|--------------------------------|-----------------|-------|
| Mean                           | 13.33           |       |
| Median                         | 5               |       |
| SD                             | 14.43           |       |
| 95% CI                         | -1.1            | 27.77 |
| Min - Max                      | 5               | 30    |
| No information retrieved       | 40 out of<br>43 | 93.02 |

Table S26. Dynamic compliance of TEVGs that have been tested on pre-clinical animal models.

| <b>Dynamic compliance mmHg (n= 8)</b> | <b>Values</b> |
|---------------------------------------|---------------|
| Mean                                  | 73.88         |
| Median                                | 100           |
| SD                                    | 59.16         |

|                          |                 |        |
|--------------------------|-----------------|--------|
| 95% CI                   | 14.73           | 133.04 |
| Min - Max                | 0.05            | 143    |
| No information retrieved | 35 out of<br>43 | 81.4   |

Tables from descriptive analysis of in vitro tested TEGVs

Table S27. Primary materials used in the manufacture of TEVGs that have been tested on in vitro models.

| Primary materials used | Frequency | %     |
|------------------------|-----------|-------|
| PCL                    | 21        | 37.50 |
| Chitosan               | 1         | 1.79  |
| Collagen               | 2         | 3.57  |
| Fibrinogen             | 1         | 1.79  |
| HDMI-PCL-Arginine      | 1         | 1.79  |
| Human Chorion          | 1         | 1.79  |
| PBSU                   | 1         | 1.79  |
| PLCL                   | 3         | 5.36  |
| PU                     | 1         | 1.79  |
| PEA                    | 1         | 1.79  |
| PEUU                   | 1         | 1.79  |
| PGA                    | 3         | 5.36  |
| PGS                    | 2         | 3.57  |
| PLA                    | 2         | 3.57  |
| PLGA                   | 4         | 7.14  |
| TPU                    | 5         | 8.93  |
| POSS/PCUU              | 1         | 1.79  |
| PTMCLLA                | 1         | 1.79  |
| PU C45D                | 1         | 1.79  |
| Decellularized ECM     | 1         | 1.79  |
| PEO                    | 1         | 1.79  |
| PAN                    | 1         | 1.79  |

|       |    |        |
|-------|----|--------|
| Total | 56 | 100.00 |
|-------|----|--------|

Table S28. Secondary materials used in the manufacture of TEVGs that have been tested on in vitro models.

| Secondary materials used  | Frequency | %      |
|---------------------------|-----------|--------|
| Collagen                  | 6         | 23.08  |
| Elastin                   | 2         | 7.69   |
| Gelatin                   | 5         | 19.23  |
| Alginate                  | 2         | 7.69   |
| DLPHEG                    | 1         | 3.85   |
| Chitosan                  | 1         | 3.85   |
| Carboxymethyl Chitosan    | 1         | 3.85   |
| Silk Yarn                 | 1         | 3.85   |
| Egg shell                 | 1         | 3.85   |
| Matitol                   | 1         | 3.85   |
| Tropoelastin              | 1         | 3.85   |
| Fibrinogen                | 1         | 3.85   |
| Silk fibroin              | 1         | 3.85   |
| Egg white-Sodium Alginate | 1         | 3.85   |
| Tecoflex (50%)            | 1         | 3.85   |
| Total                     | 26        | 100.00 |

Table S29. Types of functionalization used in the manufacture of TEVGs that have been tested on in vitro models.

| Functionalization | Frequency | %      |
|-------------------|-----------|--------|
| Anticoagulant     | 3         | 33.33  |
| Collagen          | 6         | 66.67  |
| Total             | 9         | 100.00 |

|                      |                   |       |
|----------------------|-------------------|-------|
|                      | 37 studies out of |       |
| No functionalization | 46                | 80.43 |

Table S30. Number of layers of TEVGs that have been tested on in vitro models.

| <b>Vascular graft morphology</b> | <b>Frequency</b> | <b>%</b> |
|----------------------------------|------------------|----------|
| Monolayer                        | 25               | 54.35    |
| Bilayer                          | 11               | 23.91    |
| Tri-layer                        | 7                | 15.22    |
| Multilayer (>3)                  | 3                | 6.52     |
| Total                            | 46               | 100      |

Table S31. Integration technique for the development of TEVGs that have been tested on in vitro models.

| <b>Integration made by</b> | <b>Frequency</b> | <b>%</b> |
|----------------------------|------------------|----------|
| Blend                      | 26               | 56.52    |
| Coexists                   | 20               | 43.48    |
| Total                      | 46               | 100      |

Table S32. Primary manufacturing technique of TEVGs that have been tested on in vitro models.

| <b>Initial manufacturing technique</b> | <b>Frequency</b> | <b>%</b> |
|----------------------------------------|------------------|----------|
| Decellularized                         | 1                | 2.17     |
| Dip Coating                            | 3                | 6.52     |
| Electrochemical                        | 2                | 4.35     |
| Electrospinning                        | 29               | 63.04    |
| Injected                               | 3                | 6.52     |
| Solvent Casting                        | 6                | 13.04    |
| Yarn braiding                          | 2                | 4.35     |

|       |    |     |
|-------|----|-----|
| Total | 46 | 100 |
|-------|----|-----|

Table S33. Secondary manufacturing technique of TEVGs that have been tested on in vitro models.

| Secondary manufacturing technique | Frequency    | %     |
|-----------------------------------|--------------|-------|
| Spray-coating                     | 1            | 14.29 |
| Dip Coating                       | 2            | 28.57 |
| Electrospraying                   | 1            | 14.29 |
| 3D Printing                       | 2            | 28.57 |
| Lyophilisation                    | 1            | 14.29 |
| Total                             | 7            | 100   |
| Not requiring second technique    | 39 out of 46 | 84.78 |

Table S34. Fiber diameter of TEVGs that have been tested on in vitro models.

| Fibber diameter um (n= 24) | Values       |          |
|----------------------------|--------------|----------|
| Mean                       | 4.24         |          |
| Median                     | 0.813        |          |
| SD                         | 11.2109512   |          |
| 95% CI                     | -6.97        | 15.45    |
| Min - Max                  | 0.16         | 54.6     |
| No information retrieved   | 22 out of 46 | 47.82609 |

Table S35. Internal diameter of TEVGs that have been tested on in vitro models.

| Internal diameter mm (n= 35) | Values |
|------------------------------|--------|
| Mean                         | 4.60   |

|                          |              |       |
|--------------------------|--------------|-------|
| Median                   | 4.50         |       |
| SD                       | 2.90         |       |
| 95% CI                   | 1.70         | 7.51  |
| Min - Max                | 0.7          | 15    |
| No information retrieved | 11 out of 46 | 23.91 |

Table S36. Wall thickness of TEVGs that have been tested on in vitro models.

| Wall thickness mm (n= 31) | Values       |         |
|---------------------------|--------------|---------|
| Mean                      | 0.55         |         |
| Median                    | 0.50         |         |
| SD                        | 0.38         |         |
| 95% CI                    | 0.17         | 0.94    |
| Min - Max                 | 0.011        | 2       |
| No information retrieved  | 15 out of 46 | 32.6087 |

Table S37. Porosity reported of TEVGs that have been tested on in vitro models.

| Porosity (n= 13)         | Values       |          |
|--------------------------|--------------|----------|
| Mean                     | 58.16        |          |
| Median                   | 72.00        |          |
| SD                       | 36.35        |          |
| 95% CI                   | 21.81        | 94.51    |
| Min - Max                | 0.534        | 95.77    |
| No information retrieved | 33 out of 46 | 71.73913 |

Table S38. Circumferential tensile strength of TEVGs that have been tested on in vitro models.

| Circumferential tensile strength MPa (n= 13) | Values |
|----------------------------------------------|--------|
| Mean                                         | 9.21   |



|                          |              |          |
|--------------------------|--------------|----------|
| Median                   | 5.39         |          |
| SD                       | 16.49        |          |
| 95% CI                   | -7.28        | 25.70    |
| Min - Max                | 0.047        | 63       |
| No information retrieved | 33 out of 46 | 71.73913 |

Table S39. Longitudinal tensile strength of TEVGs that have been tested on in vitro models.

| Longitudinal tensile strength MPa (n= 37) | Values      |          |
|-------------------------------------------|-------------|----------|
| Mean                                      | 94.30       |          |
| Median                                    | 4.57        |          |
| SD                                        | 508.29      |          |
| 95% CI                                    | -413.99     | 602.59   |
| Min - Max                                 | 0.024       | 3100     |
| No information retrieved                  | 9 out of 46 | 19.56522 |

Table S40. Burst strength of TEVGs that have been tested on in vitro models.

| Burst Strength mmHg (n= 17) | Values       |          |
|-----------------------------|--------------|----------|
| Mean                        | 2161.14      |          |
| Median                      | 1718.39      |          |
| SD                          | 1835.61      |          |
| 95% CI                      | 325.53       | 3996.75  |
| Min - Max                   | 96.68        | 6262.93  |
| No information retrieved    | 29 out of 46 | 63.04348 |

Table S41. Suture retention strength of TEVGs that have been tested on in vitro models.

| Suture retention strength N (n= 11) | Values |
|-------------------------------------|--------|
| Mean                                | 7.34   |

|                          |                 |          |
|--------------------------|-----------------|----------|
| Median                   | 6.73            |          |
| SD                       | 7.37            |          |
| 95% CI                   | -0.04           | 14.71    |
| Min - Max                | 0.43            | 27       |
| No information retrieved | 35 out of<br>46 | 54.34783 |

Table S42. Dynamic compliance of TEVGs that have been tested on in vitro models.

| Dynamic compliance mmHg (n= 6) | Values          |          |
|--------------------------------|-----------------|----------|
| Mean                           | 327.28          |          |
| Median                         | 349.50          |          |
| SD                             | 179.50          |          |
| 95% CI                         | 147.78          | 506.79   |
| Min - Max                      | 110             | 540      |
| No information retrieved       | 40 out of<br>46 | 54.34783 |
